# Supplementary material
Source: PubMed Central journal article supplement (PMC5832532)
Supplement: NIHMS908170-supplement-supplement_1.pdf [file NIHMS908170-supplement-supplement_1.pdf]

## **SUPPLEMENTARY INFORMATION**

Data on HBV immunization coverage among 1-year-olds, prevalence of obesity (percentage of adult population with a body mass index (BMI)  $\geq 30$  kg/m<sup>2</sup>), and alcohol per capita (APC) consumption were obtained from the WHO Indicator and Measurement Registry.<sup>1</sup> APC consumption (total amount of alcohol consumed per adult (15+ years) over a calendar year in litres of pure alcohol) was available yearly by country from 1980-2014, and projections available for 2015, 2020 and 2025.

**Annex Figure 1.** Percentage of defined adult population with a body mass index (BMI) of 30 Kg/m<sup>2</sup> or higher in 2010 for 30 countries obesity (WHO Indicator and Measurement Registry)<sup>1</sup>

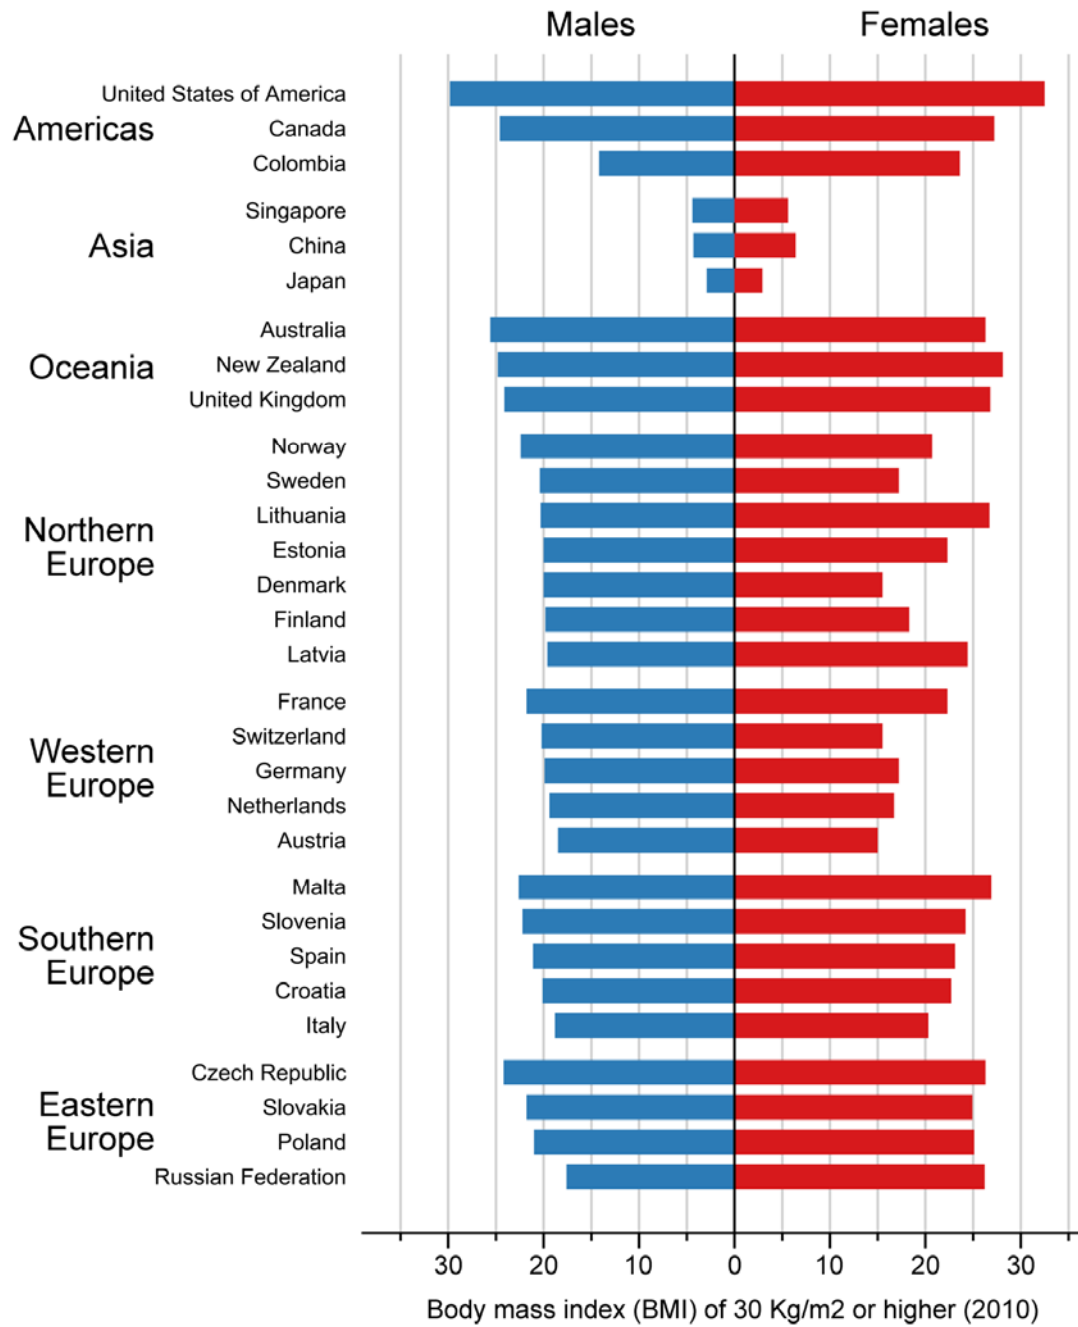

**Annex Figure 2.** Recorded alcohol per capita (for 15+ year olds) consumption (in litres of pure alcohol – all types) for 1980-2013 (solid lines) and predicted alcohol consumption (dashed lines) for 2015, 2020 and 2025 for 29 countries (projections data for Estonia is missing; WHO Indicator and Measurement Registry)<sup>1</sup>

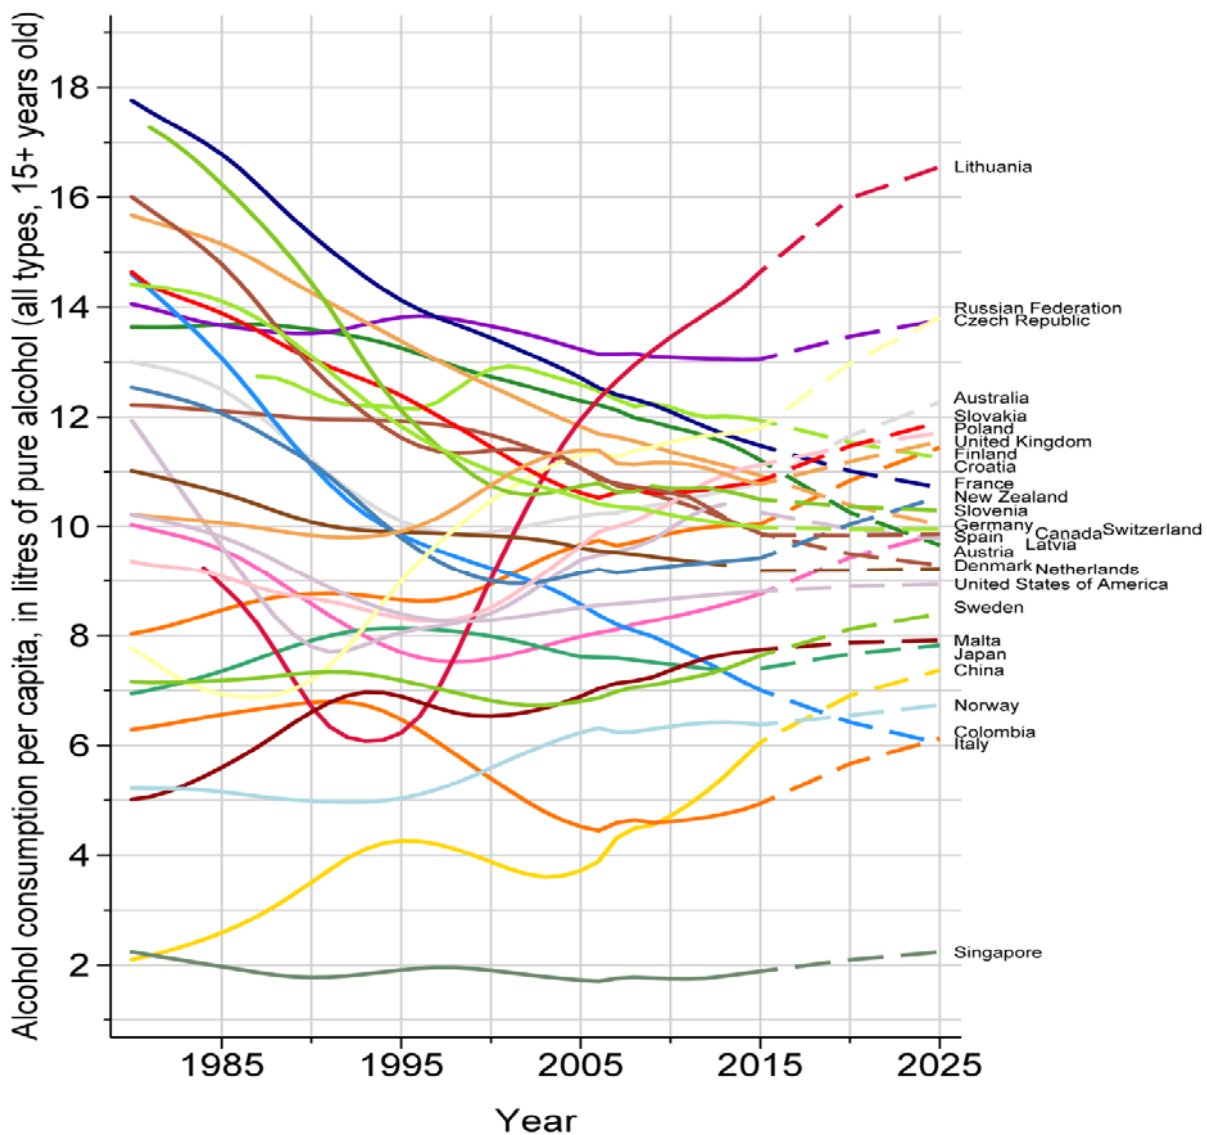

**Annex Figure 3.** Scatterplot of age-standardised incidence rates of PLC per 100,000, both sexes, in 2005 and recorded alcohol per capita (for 15+ year olds) consumption (in litres of pure alcohol – all types) for 1995\* (WHO Indicator and Measurement Registry)<sup>1</sup>

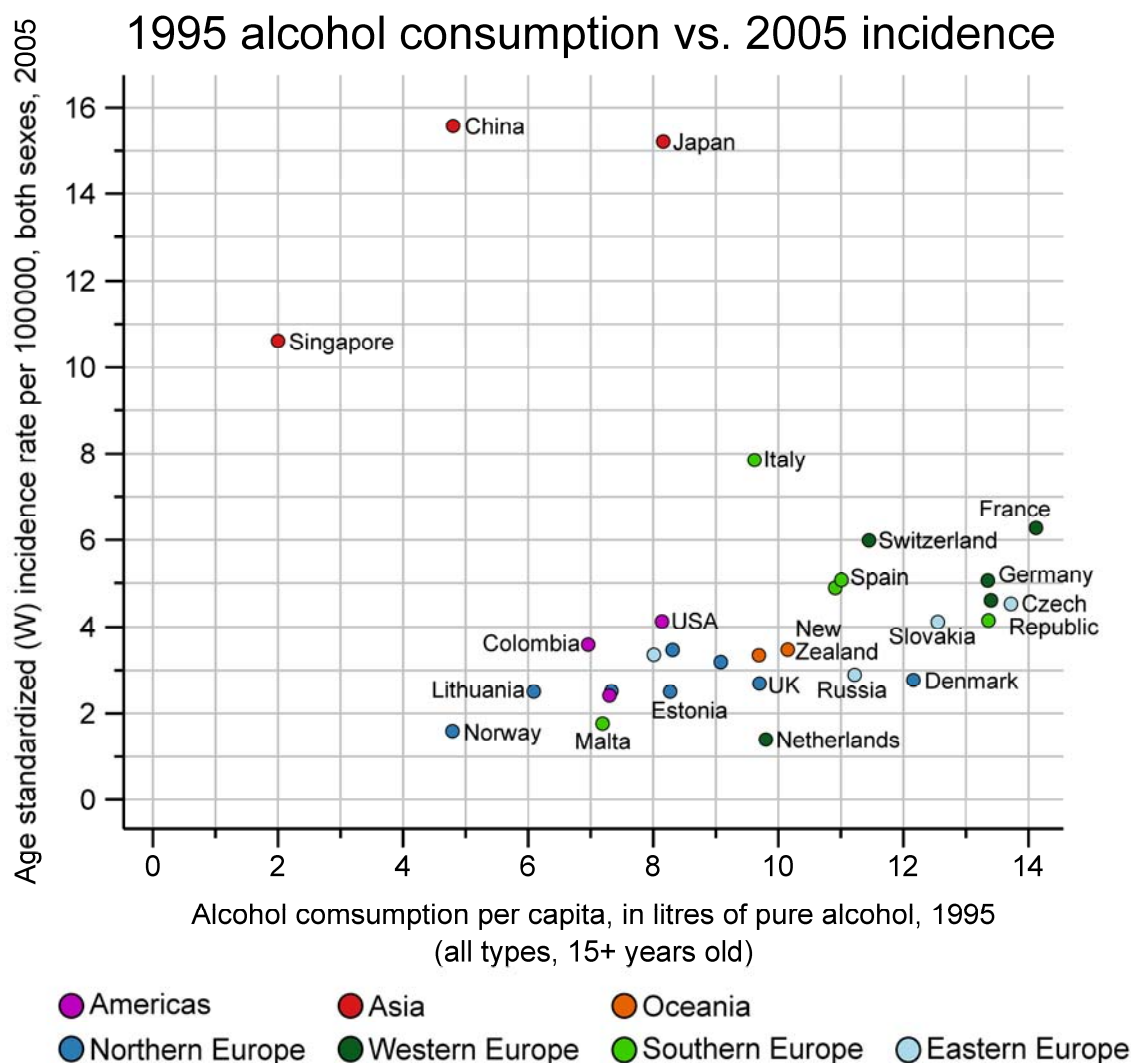

\*  $r=0.625$ ,  $p\text{-value}<0.01$  when excluding Asian countries;  $r=0.270$   $p\text{-value}=0.149$  including Asia

1. World Health Organization. The World Health Organization Indicator and Measurement Registry [http://apps.who.int/gho/indicatorregistry/App\\_Main/indicator\\_registry.aspx](http://apps.who.int/gho/indicatorregistry/App_Main/indicator_registry.aspx) (accessed 2 June 2016).
